# Regime shifts, alternative states, and hysteresis in the *Sarracenia* pitcher plant microecosystem

Matthew K. Lau<sup>\*†1</sup>, Benjamin Baiser<sup>2</sup>, Amanda Northrop<sup>3</sup>, Nicholas J. Gotelli<sup>3</sup>, and  
Aaron M. Ellison<sup>1</sup>

<sup>1</sup>Harvard University, Harvard Forest, 324 N Main St, Petersham, MA 01366

<sup>2</sup>University of Florida, Department of Wildlife Ecology and Conservation, 110  
Newins-Ziegler Hall, PO Box 110430, Gainesville, FL 32611

<sup>3</sup>University of Vermont, Department of Biology, Room 120A, Marsh Life Science  
Building, 109 Carrigan Dr, Burlington, Vermont 05405

\**Email*: matthewklau@fas.harvard.edu

†*ORCID*: 0000-0003-3758-2406

*Manuscript type*: Article.

*Manuscript elements*: Figure 1, figure 2, figure 3, figure 4, figure 5, table 1.

*Keywords*: alternative states, regime shifts, organic-matter loading, model systems, *Sarracenia*

## Abstract

Changes in environmental conditions can lead to rapid shifts in ecosystem state ("regime shifts"), which subsequently returns slowly to the previous state ("hysteresis"). Large spatial, and temporal scales of dynamics, and the lack of frameworks linking observations to models are challenges to understanding, and predicting ecosystem responses to perturbations. The naturally-occurring microecosystem inside leaves of the northern pitcher plant (*Sarracenia purpurea*) exhibits oligotrophic, and eutrophic states that can be induced experimentally by adding insect "prey." This regime shift has been modeled previously with difference equations including parameters for pitcher photosynthesis, oxygen diffusion through the pitcher liquid, prey input, and oxygen demand of decomposition. Here, we simplify the model structure, test, and parameterize it using data from a prey addition experiment, and use sensitivity analysis to reveal different model outcomes that are related to plausible values of free parameters. Simulations clearly illustrate that the microecosystem model displays regime shifts, and subsequent hysteresis. Parallel results were observed in the plant itself after experimental enrichment with prey. Decomposition rate of prey was the main driver of system dynamics, including the time the system remains in an anoxic state, and the rate of return to an oxygenated state. Biological oxygen demand influenced the shape of the system's return trajectory. The combination of simulated results, sensitivity analysis, and use of empirical results to parameterize the model more precisely demonstrates that the *Sarracenia* microecosystem model displays behaviors qualitatively similar to models of larger ecological systems. Given its scalability, the *Sarracenia* microecosystem is a valuable experimental platform for rapidly studying ecological dynamics of major importance.

## Introduction

Regime shifts in ecological systems are defined as rapid changes in the spatial or temporal dynamics of a more-or-less stable system. Ecological regime shifts are caused by slow, directional changes in one or more underlying state variables, such as species abundance, dissolved oxygen content, or nutrients (Scheffer *et al.* 2009, 2001). Regime shifts are of particular concern when the return rate to a previous (and perhaps more desirable) state is slow or requires a larger input of energy or resources relative to what initiated the state change (i.e., hysteresis). In the last several years, many researchers have suggested that a wide range of ecological systems are poised to “tip” into new regimes (Petraitis & Dudgeon 2016; Scheffer *et al.* 2009), or even that we are approaching a planetary tipping point (Barnosky *et al.* 2012; but see Brook *et al.* 2013). Because changes in the underlying state variables of most ecosystems occur over time spans of years to centuries, our understanding of the causes, and consequences of ecological regime shifts has progressed relatively slowly. More rapid progress could be achieved by working with well-understood model systems that can be described mathematically, and manipulated experimentally over shorter time scales.

It is rare to find an ecological system in which the occurrence of a regime shift, and its cause-and-effect relationship with one or more underlying environmental drivers is unambiguous (Bestelmeyer *et al.* 2011). This is primarily because long time series of observations collected at meaningfully large spatial scales are required to identify the environmental driver(s), its relationship to the response variable of interest, the stability of each state, the breakpoint between them, and hysteresis of the return time to the original state (Bestelmeyer *et al.* 2011; Petraitis & Dudgeon 2016). Detailed modeling, and decades of observations, and experiments have led to a thorough understanding of one canonical example of an ecological regime shift: the rapid shift from oligotrophic (low nutrient) to eutrophic (high nutrient) states in lakes (e.g., Carpenter & Brock 2006; Carpenter *et al.* 2011). The primary difficulties with using lakes as models for studying alternative states, and ecological regime shifts are their large size (which precludes

48 extensive replication: Carpenter 1998), and the long time scales (decades) required to observe a  
regime shift, subsequent ecosystem hysteresis, and eventual recovery (Contamin & Ellison 2009;  
Mittlebach *et al.* 1995). Models of lake ecosystems, and their food webs, and associated empirical  
51 data, have revealed that returning lakes from a eutrophic to an oligotrophic state can be very  
slow—on the order of decades to centuries—(Contamin & Ellison 2009), and depends not only  
on slowing or reversing directional changes in underlying state variables but also on the internal  
54 feedback dynamics of the system. Other aquatic systems, including fisheries (Biggs *et al.* 2009),  
rocky intertidal communities, and coral reefs (Petraitis & Dudgeon 2016) have provided addi-  
tional empirical support for these model results, in terms of both dynamics, and duration (Dakos  
57 *et al.* 2012).

In a previous study, we experimentally demonstrated that organic-matter loading (i.e., the  
addition of insect biomass [“prey”] to pitchers) can cause a shift from oligotrophic to eutrophic  
60 conditions in a naturally-occurring microecosystem: the water-filled leaves of the northern (or  
purple) pitcher plant, *Sarracenia purpurea* L. (Sirota *et al.* 2013). Because bacteria that reproduce  
rapidly drive the nutrient-cycling dynamics of the five-trophic level *Sarracenia* microecosystem  
63 (Butler *et al.* 2008), prey additions cause shifts from oligotrophic to eutrophic states in hours  
or days rather than years or decades. Further, the comparatively small volume of individual  
pitchers, the ease of growing them in greenhouses, and the occurrence of large, experimentally  
66 manipulable populations in the field (Srivastava *et al.* 2004) has allowed for replicated studies of  
trophic dynamics, and regime shifts in a whole ecosystem. Here, we extend, and mathematically  
simplify Sirota *et al.*'s (2013) mathematical model of the *Sarracenia* microecosystem. We estimate  
69 parameter values using new empirical data, and introduce more realism into the underlying  
environmental drivers of the model. We then use sensitivity analysis to identify the model  
parameters that control most strongly the dynamics of the system. We illustrate that—as in  
72 large lakes—once organic-matter input is stopped, the *Sarracenia* microecosystem can eventually  
overcome the hysteresis in the system, and return to an oligotrophic state. We conclude that  
the mathematical model illustrates dynamic behaviors that are qualitatively similar to models of

75 regime shifts in lakes, and other ecosystems, and we suggest that the *Sarracenia* microecosystem  
is a scalable model for studying ecological regime shifts in real time.

## Methods

### 78 **The pitcher-plant microecosystem**

The eastern North American pitcher plants (*Sarracenia* spp.) are perennial carnivorous plants  
that grow in bogs, poor fens, seepage swamps, and sandy out-wash plains (Schnell 2002). Their  
81 leaves are modified into “pitchers” (Arber 1941), tubular structures that attract, and capture  
arthropods, and occasionally small vertebrate prey (e.g., Butler *et al.* 2005; Ellison & Gotelli 2009).  
In the pitchers, prey are shredded by obligate pitcher-inhabiting arthropods, including histios-  
84 tomatid *Sarraceniopus* mites, and larvae of sarcophagid (*Fletcherimyia fletcheri*), and chironomid  
flies (*Metrocnemius knabi*) (Addicott 1974; Heard 1994; Jones 1923). The shredded organic matter  
is further decomposed, and mineralized by a diverse assemblage of microbes, including protozoa  
87 (Cochran-Stafira & von Ende 1998), yeasts (Boynton 2012), and bacteria (Peterson *et al.* 2008).

Unlike other species of *Sarracenia* that also secrete, and use digestive enzymes to extract  
nutrients from their captured prey, *S. purpurea* secretes digestive enzymes at most for only a  
90 few days during development (Gallie & Chang 1997). Instead, *Sarracenia purpurea* relies on its  
aquatic food web to decompose the prey, and mineralize their nutrients (Butler & Ellison 2007).  
As a result, the rainwater-filled pitchers of *S. purpurea* are best considered a detritus (prey)-  
93 based ecosystem in which bacterially-mediated nutrient cycling determines whether it is in an  
oligotrophic or eutrophic state (Bradshaw & Creelman 1984; Butler *et al.* 2008; Sirota *et al.* 2013).

### **Oxygen dynamics in lakes, and pitchers**

96 Trophic state (i.e., oxygen dynamics) in both lakes, and *Sarracenia* pitchers can be described using  
a simple model that yields alternative oligotrophic, and eutrophic states, and hysteresis in the  
shift between them (Scheffer *et al.* 2001):

$$\frac{dx}{dt} = a - bx + rf(x) \quad (1)$$

99 In Scheffer's model, the observed variable  $x$  (e.g., oxygen concentration) is positively correlated with state variable  $a$  (e.g., rate of nutrient input or photosynthesis), and negatively correlated with state variable  $b$  (e.g., rate of nutrient removal or respiration). The function  $rf(x)$  102 defines a positive feedback that increases  $x$  (e.g., the rate of nutrient recycling between the sediment in lakes or mineralization-immobilization by bacteria of shredded prey in a water-filled *Sarracenia* pitcher). If  $r > 0$  and the maximum of  $\{rf(x)\} > b$ , there will be more than one 105 equilibrium point (i.e., stable state) (Scheffer *et al.* 2001); the function  $f(x)$  determines the shape of the switch between the states and the degree of hysteresis.

Following Scheffer *et al.* (2001), we use a Hill function for  $f(x)$ :

$$f(x) = \frac{x^p}{x^p + h^p} \quad (2)$$

108 The Hill function provides a simple model that can produce threshold behavior. The inflection point is determined by the parameter  $h$  (Fig. 1A). Given that the other parameters are set so that there are alternative states (i.e.,  $rf(x) > b$ ),  $h$  determines the threshold for the transition 111 between the alternative states. When viewed in a phase-space (Fig. 1B), the transition between states can be seen as a path traversed by the system between distinct regions (i.e., phases). In part because of this threshold property, the Hill function has been applied to systems ranging 114 from biochemistry, and microbiology, and through to ecology, wherein system dynamics depend on a limiting resource (e.g., Mulder & Hendriks 2014).

We model the dynamics of the trophic state of the *Sarracenia* microecosystem using a difference 117 equation of the same underlying form as Eq. 1:

$$x_{t+1} = \underbrace{a_t A_t}_{\text{Photosynthesis}} - \underbrace{\left\{ m + a_t \left[ \frac{w_{t-1}}{w_{t-1} + K_w} \right] \right\}}_{\text{BOD}} + \underbrace{D_t(x_t)}_{\text{Diffusion}} \quad (3)$$

Each model term is described below, and summarized in Table 1.

The model (Eq. 3) of the *Sarracenia* microecosystem (Fig. 2A) is made up of the two main  
120 terms: production of oxygen by photosynthesis, and use of oxygen (respiration) during decompo-  
sition (BOD: biological oxygen demand). The pitcher fluid is oxygenated ( $x$ ) at each discrete time  
step ( $t$ ) as the plant photosynthesizes ( $A_t$ ). The value of  $A_t$  is determined by sunlight, which we  
123 model as a truncated sine function producing photosynthetically active radiation (PAR) (Fig. 2B),  
and by the maximum photosynthetic rate ( $A_{max}$ ), (Fig. 2C), which leads to the production of  
dissolved oxygen in the pitcher fluid (Fig. 2D).

126 Decomposition of shredded prey by bacteria requires oxygen. The oxygen demand from res-  
piration is modeled by the BOD term in Eq. 3. The parameter  $m$  is the basal metabolic respiration  
of the food web with no prey to decompose in the system. Adding prey ( $w$ ) induces decomposi-  
129 tion, which we model as a negative exponential function with rate parameter  $\beta$ , and a constant  
 $W$  (maximum prey mass decomposed over 48 hours) using Eq. 4, and illustrated in Figure 2E.

$$w_{t+1} = w_t \cdot e^{-\beta \cdot W} \quad (4)$$

Bacterial populations increase at a rate determined by a half-saturation function with parame-  
132 ter  $K_w$  (Eq. 3), which increases BOD, and the depletion of oxygen from the pitcher fluid (Fig. 2F).  
Food web demand for oxygen (i.e., BOD) depends on the decomposition rate ( $\beta$ ), and the shape  
parameter ( $K_w$ ), but only when prey is present in the system ( $w_{t-1} > 0$  in Eq. 3). When prey is  
135 absent (i.e.,  $w_{t-1} = 0$ ), BOD terms simplify by multiplication to the basal metabolic rate ( $m$ ).

The other impact of prey addition, and subsequent decomposition by the food web is the  
release of nutrients into the pitcher fluid. The mineralization variable  $n_t$  (Eq. 3), which is modeled  
138 as proportional to the product of the amount of oxygen, and prey in the system (i.e.,  $n_{t+1} =$   
 $c \cdot (w_t \cdot x_t)$  where  $c$  is a constant of proportionality), creates a feedback from decomposition to  
oxygen production by the plant (i.e., the path in Fig. 2A from the food web to nutrients to pitcher  
141 to oxygen, and back to the food web).

Photosynthesis is limited by available nutrients (primarily nitrogen, and phosphorus, see  
Ellison 2006; Givnish *et al.* 1984) that are mineralized by bacteria from the prey (Butler *et al.*

144 2008). Photosynthesis is augmented ( $a_t$ ) by nutrient mineralization rate ( $s$ ). We model  $a_t$  as a saturating function with bounds determined by the range terms ( $a_{min}$ , and  $a_{max}$ ),  $s$ , and the point of saturation ( $d$ ):

$$a_{t+1} = a_t \times \left\{ \frac{a'_{max} - a'_{min}}{1 + e^{-s \cdot n_t - d}} + a'_{min} \right\} \quad (5)$$

147 Thus, the mineralization term couples respiration (oxygen depletion) to photosynthesis (oxygen production) when prey is introduced to the system, and the food web begins to decompose the prey and release nutrients into the pitcher fluid. Finally, a small amount of oxygen diffuses  
150 into the pitcher fluid directly from the atmosphere ( $D(x)$ ), which is unlikely to influence the fluid oxygen at a rate that is negligible in comparison to photosynthesis or BOD.

### Estimating decomposition rate

153 We used data from a greenhouse pitcher-feeding experiment to estimate the decomposition parameter. The experiment was conducted over 35 days, starting on July 6, 2015, in a temperature-controlled greenhouse at the University of Vermont's Biological Research Complex (Burlington, Vermont, USA). Eighteen newly-formed pitchers  $> 8$  ml in volume were rinsed with deionized  
156 water, and randomly assigned to one of three organic matter addition treatments: 0.0, 0.5, or 5.0 mg/ml of pitcher fluid. Pitcher fluid was collected from randomly-selected pitchers at Molly Bog  
159 (Morristown, Vermont, USA: 44.4997562 N, -72.641978 W) on the morning of 6 July 2015. The fluid was transported to the greenhouse, filtered through the 30-micron frit bed of a chromatography column (BioRad, Hercules, California, USA) to remove macrobes, homogenized, and added to  
162 experimental pitchers in the greenhouse.

Pitchers were loaded with a single pulse of organic matter every morning for the first four days. In this experiment, the organic matter was bovine serum albumin (BSA), DNA from salmon  
165 testes at a concentration of 1.5 micrograms per milligram of BSA, and trace elements potassium, calcium, sodium, magnesium, and manganese in a ratio of 1:0.115:0.044:0.026:0.0001. In a pilot study, this organic matter "cocktail" yielded similar changes in dissolved oxygen as we had



168 obtained previously using ground wasps as organic matter (Sirota et al. 2013). Three 100- $\mu$ L  
aliquots of pitcher fluid were sampled from each pitcher twice a day from day 0 to day 20 at  
8:30am, and 5:00pm ( $\pm 2$  hrs), once per day from day 20 to day 28 at 8:30am ( $\pm 2$  hrs), and once  
171 each on days 30, 31, 33, and 35 (8:30am  $\pm 2$  hrs). Samples were centrifuged at 13,000g, after  
which the supernatant containing soluble BSA was removed, placed in a sterile tube, and frozen  
at -80 C until analyzed. A simple Bradford assay (Bradford 1976) was used to determine the  
174 concentration of BSA in each of the pitcher fluid samples. The assay was done using Bradford  
reagent (VWR), and the absorbance of each sample was measured on a Biophotometer Plus  
spectrophotometer (Eppendorf) at an optical density of 600 nm. Samples were read randomly on  
177 the spectrophotometer to avoid reaction time as a confounding variable. Standard curves were  
created, and sample concentrations were determined using the R software system (R Core Team  
2016).

180 We used an empirical least-squares estimator (LSE) approach to generate a “best fit” value for  
the decomposition parameter ( $\beta$ ) in Eq. 4, given the quantity of prey added in the experiment,  
and the duration of the prey addition. As  $K_w$  is not a part of the decomposition term, it was set it  
183 to 2, and we did not vary it during parameter estimation, and model fitting. We then ran a series  
of 35-day simulations (equivalent to the run-time of the prey-addition experiment) in which  $\beta$   
was sampled from a grid of values between ranging from 1E-8 to 0.0007, and the amount of prey  
186 in the simulation was recorded at each simulated minute. For each run, the sum of squared  
errors (SSE) was recorded as  $\sum (sim - obs)^2$ . The  $\beta$  that minimized the SSE in each simulation  
was considered to be the best-fit value for each replicate pitcher ( $n = 12$ ).

## 189 Sensitivity Analysis

We used a sensitivity analysis in which we varied the prey addition rate ( $w$ ), decomposition rate  
( $\beta$ ), and the half-saturation constant  $K_w$  to explore the behavior of the microecosystem model  
192 across a wide range of parameter space. Rather than set combinations of fixed values for the three  
parameters of interest, we sampled the model parameter space by drawing values independently

from a uniform distribution:  $K_w \sim U(0.0001, 3)$ ,  $\beta \sim U(1.0E-6, 2.0E-3)$  and  $w \sim U(0, 100)$ . To  
195 characterize baseline (oligotrophic) oxygen concentrations, for each combination of  $\beta$ , and  $K_w$   
we ran one simulation in which no prey was added to the system ( $w = 0$ ). In all simulations ( $n$   
= 15000) variables were initialized as 0 with the exception of oxygen ( $x$ ), which was initialized  
198 using the photosynthesis term ( $x_0 = 7.55$ ). Prey additions occurred at mid-day on days 4-6  
(i.e.,  $t = 6480$  to  $t = 9360$ ), each simulation ran for 30 simulated days (43,200 minutes), and  
output was saved for each simulated minute. The simulations were initialized using a random  
201 sample of parameter values, and run in parallel. Because the model is completely deterministic,  
the resulting runs can be reproduced by starting the simulations with the exact values used to  
initialize, and parameterize the models, which are available via the Harvard Forest Data Archive  
204 (<http://harvardforest.fas.harvard.edu/harvard-forest-data-archive/>).

to aid in the detection of the impact of the most important parameters and variables, in all  
simulations we set some parameter values to zero, which altered the model in the following two  
207 ways. First, we ignored the  $D(x_t)$  term because we assumed that the amount of oxygen diffusing  
directly into the pitcher fluid from the atmosphere would be orders of magnitude lower than  
oxygen produced by pitcher photosynthesis (Kingsolver 1979). Second, we noted that since the  
210 basal metabolic respiration of the food web parameter ( $m$ ) is an additive constant, any change in  
the value of the constant  $m$ , (basal respiration of the microbial community) would result only in  
a proportional change in value of  $x$ , not in the shape (i.e.,  $dx/dt$ ), of the oxygen production over  
213 time. Thus, we could set  $m = 0$  without loss of generality.

By setting  $m = 0$ , we also observed that the photosynthetic augmentation term ( $a_t$ ) influenced  
photosynthesis ( $A_t$ ), and BOD ( $\frac{w_{t-1}}{w_{t-1} + K_w}$ ) identically. Therefore, the parameters  $s$ , and  $d$  in Eq. 5  
216 could be set as constants in the sensitivity analysis. By ignoring diffusion, setting  $m = 0$ , and  
fixing  $s$ , and  $d$ , we reduced the dimensionality of the sensitivity analysis to three ( $w$ ,  $\beta$ , and  $K_w$ ),  
which increased the interpretability of the results.

219 We calculated two measures of the state of the system from the time series of oxygen con-  
centration ( $x_t$ ): hypoxia, and return rate. We defined hypoxia in the model to be an oxygen

concentration of  $\leq 1.6 \text{ mgL}^{-1}$ , which is the median lethal  $\text{O}_2$  concentration ( $[\text{O}_2]$ ) for aquatic  
222 animals (Vaquer-Sunyer & Duarte 2008). We measured the return rate of the system as the linear  
trend in  $[\text{O}_2]$  (i.e., after removing the daily cycle in oxygen resulting from photosynthesis) across  
the entire simulation using Pearson's correlation coefficient. Although the return trajectory can  
225 be non-linear, the linear trend measures the gross trends of returning (positive), little impact of  
feeding (zero) or remaining at depressed oxygen levels.

### Code Availability, and Execution

228 The model was coded in the **R** programming language (R Core Team 2016). The 15,000 model  
runs for the sensitivity analysis were run on the Odyssey Supercomputer Cluster at Harvard  
University (Research Computing Group, FAS Division of Science, Cambridge, Massachusetts).  
231 Data, code for the simulations, and output of analyses are available in the Harvard Forest Data  
Archive (<http://harvardforest.fas.harvard.edu/harvard-forest-data-archive>).

### Results

234 The equation representing decomposition, and BOD resembles the Hill function in a general  
model of state changes with hysteresis (Eqs. 1, and 2). In general, when a Hill function is used in  
a basic alternative states model (e.g.,  $rf(x) > b$  in Eq. 1), the inflection point (e.g., half-saturation  
237 constant  $K_w$ ) determines the threshold (Fig. 1A). Thus, modeling decomposition, and BOD using  
a Hill function provided us with sufficient flexibility to yield a variety of state changes.

The simulations with the model produced dynamics observed in the empirical pitcher plant  
240 microecosystem. Because photosynthesis is nutrient-limited in *Sarracenia* (Ellison 2006), addition  
of prey increased modeled photosynthesis (Fig. 3A) relative to oligotrophic, prey-free pitchers. In  
the oligotrophic state, and when no prey was added, BOD remained low throughout the entire  
243 simulation (black line in (Fig. 3B). After prey was added on, for example, days 4-6 ( $t = 6480$   
to  $t = 9360$  minutes), the system jumped into its alternative state: BOD increased rapidly then

declined slowly as prey was mineralized (grey line in Fig. 3B). The combination of the smooth,  
246 slow recovery response of photosynthesis to prey addition, and the abrupt shift in BOD following  
prey addition (Fig. 3A & B) resulted in an abrupt shift in the system from an oxygenated state  
into an anoxic state, and a very slow (hysteretic) recovery (Fig. 3C). The hysteresis of the system  
249 is clearly apparent when oxygen concentration is plotted as a time-lagged phase plot (lag = 1440  
minutes starting at  $t=720$ ), which shows the change in oxygen following addition of prey at  $t =$   
6480, and the slow return due to high BOD (Fig. 3D). These results accord with observations from  
252 field, and greenhouse experiments in which oxygen was observed to decline with the capture or  
addition of insect prey to the pitcher (Sirota *et al.* 2013), and demonstrate the presence of both  
state changes, and hysteresis (i.e., Fig. 3D) for at least some parameterizations of the model.

255 The parameter fitting, and sensitivity analysis revealed several key effects of the parame-  
ters that we varied. First, the LSE model-fitting procedure resulted in an estimate of  $\beta$  of  
 $\bar{x} = 0.00041 \pm 0.0004$  [SE] (Fig. 4, vertical lines). Second, varying  $\beta$  had a large effect on the  
258 percent time spent in an hypoxic state, and the return rate (steeper contours with increasing  $\beta$  in  
Fig. 4). Last, varying the amount of prey by two orders of magnitude produced a sharp threshold  
for the effect of varying  $\beta$  on hypoxia, and return rate (Fig. 4).

261 Although varying  $\beta$  has a potentially larger effect on the dynamics of the microecosystem  
than varying  $K_w$ , the latter plays an important role in determining the return trajectory of the  
oxygen. For simulations with lower values of  $K_w$ , the oxygen concentration was still exponentially  
264 increasing when the simulation ended (Fig. 5A). Relative to simulations with higher  $K_w$ , the  
return rate was faster when  $\beta$  was low enough, and there was prey (i.e.,  $w_t$ ) remaining in the  
pitcher at the last observed time (Fig. 5B). Thus, in this part of the parameter space, if another  
267 round of feeding were to occur at a similar level of prey input, the system would never recover,  
and would remain in or near an hypoxic state.

## Discussion

270 General theoretical work in complex systems has suggested that the definition of system bound-  
aries is arbitrary, and carries the potential for systems dynamics to be mechanistically connected  
to, but unpredictable from, lower levels (or scales) of organization (Levine *et al.* 2016; Ulanowicz  
273 2012). However, others have argued that food web dynamics of whole ecosystems can be inferred  
from the components (i.e., motifs, and modules) of these ecosystems (McCann 2012). Overall,  
our model of the *Sarracenia* microecosystem supports the latter assertion: a focus on particular  
276 pathways (e.g., photosynthesis, decomposition) reproduced the non-linear behavior of its oxygen  
dynamics, including state changes, and hysteresis. The results of the sensitivity analysis also  
revealed that the carrying capacity of the bacterial community (as it was simulated by the effect  
279 of  $K_w$ ) could contribute to observed non-linear state-changes of the *Sarracenia* microecosystem.

Although the dynamics of the *Sarracenia* microecosystem are very similar to those of lakes,  
and streams, there are several differences. First, oxygen levels in the pitcher plant are dynami-  
282 cally controlled both by photosynthesis of the plant that serves as a strong driver of oxygen levels.  
In lakes, the primary oxygen production is carried out by phytoplankton, which are emersed in  
the aquatic system. Second, lake food webs are “green” (i.e., plant-based); whereas pitcher plant  
285 food webs are “brown”, or detritus-based (Butler *et al.* 2008). In lakes, the shift to a eutrophic  
state occurs through addition of limiting nutrients (usually N or P), accumulation of producer  
biomass that is uncontrolled by herbivores (see Wood *et al.* 2016), and subsequent decomposition  
288 that increases biological oxygen demand (Carpenter *et al.* 1995; Chislock *et al.* 2013). The *Sar-  
racenia* microecosystem’s “brown” food web also experiences an increase in oxygen demand, and  
microbial activity; however, this occurs during the breakdown of detritus that is characteristic of  
291 its shift from an oligotrophic to a eutrophic state (Sirota *et al.* 2013). Even though the source of  
the nutrients in the *Sarracenia* microecosystem is “brown”, the functional shape of the pathways  
involved in its nutrient cycling are similar to those in lakes with “green” food webs, and are  
294 likely to lead to similar qualitative dynamical behavior of both systems.

Predictions based on the model are highly sensitive to changes in the parameterization of  $\beta$ . In the initial parameterization of this model, we started with an empirical estimate of decomposition rate in which  $> 99\%$  of the average amount of prey captured could be decomposed in a single day (Baiser *et al.* 2011; Sirota *et al.* 2013). This is extremely rapid decomposition relative to a set of 58 previously published food webs (Lau *et al.* 2016), in which 1.27% to 66.2% of available detritus or organic matter is decomposed each day. When we set the decomposition parameter ( $\beta$ ) equal to 2.57E-6, the overall decomposition rate approached the mean of the published food webs ( $24.22\% \pm 2.79$  S.E.). This value for  $\beta$  (0.0004) is within the parameter space that we observed experimentally, and used in our sensitivity analysis, and suggests that insights gained from the *Sarracenia* microecosystem should be scalable to larger systems.

The results of our model, and sensitivity analyses, combined with empirical data from Sirota *et al.* (2013), suggest that the *Sarracenia* microecosystem should be a powerful system with which to develop new understanding of the dynamics of complex ecosystems. Both the abiotic environment, and the biotic components of the *Sarracenia* microecosystem are comparable in complexity to large lakes (Baiser *et al.* 2016; Kitching 2000; Srivastava *et al.* 2004), and it features similar critical transitions, and non-linear dynamical behavior, both of which are of broad interest for theoretical ecologists. The food web of *Sarracenia purpurea* consists of species that share an evolutionary history, organized into five trophic levels, and with interactions that have been shaped by both environmental, and co-evolutionary forces (Bittleston *et al.* 2016; Ellison & Gotelli 2009).

Mesocosm studies have been critiqued for lacking any or all of these characteristics (Carpenter 1998) but a recent meta-analysis of the scaling relationships of the half-saturation constant ( $K_w$ ) provides evidence that uptake of nutrients such as nitrogen, phosphorus by food webs, and inter-trophic nutrient transfers, likely are invariant to spatial scale (Mulder & Hendriks 2014). At the same time, the dynamics of the *Sarracenia* microecosystem play out over days, rather than years, decades, centuries, or even longer. Thus, it provides an experimental, and computational model with which to study the linkages between “green”, and “brown” food webs (e.g., Sivarin *et al.* (2016); Wolkovich *et al.* (2014)), and identify early warning signals of state changes

in ecosystems that are of crucial importance for environmental management (Abbott & Battaglia 2015; Hoekman 2010).

## 324 **References**

- Abbott, M.J. & Battaglia, L.L. (2015) Purple pitcher plant (*Sarracenia rosea*) dieback and partial  
community disassembly following experimental storm surge in a coastal pitcher plant bog.  
327 *PLoS ONE*, **10**.
- Addicott, J.F. (1974) Predation and prey community structure: an experiment study of the effect  
of mosquito larvae on the protozoan communities of pitcher plants. *Ecology*, **55**, 475–492.
- 330 Arber, A. (1941) On the morphology of the pitcher-leaves in *Heliamphora*, *Sarracenia*, *Darlingtonia*,  
*Cephalotus*, and *Nepenthes*. *Annals of Botany*, **5**, 563–578.
- Baiser, B., Ardeshiri, R.S. & Ellison, A.M. (2011) Species richness and trophic diversity increase  
333 decomposition in a co-evolved food web. *PLoS One*, **6**, e20672.
- Baiser, B., Elhesha, R. & Kahveci, T. (2016) Motifs in the assembly of food web networks. *Oikos*,  
**125**, 480–491.
- 336 Barnosky, A.D., Hadly, E.A., Bascompte, J., Berlow, E.L., Brown, J.H., Fortelius, M., Getz, W.M.,  
Harte, J., Hastings, A., Marquet, P.A., Martinez, N.D., Mooers, A., Roopnarine, P., Vermeij, G.,  
Williams, J.W., Gillespie, R., Kitzes, J., Marshall, C., Matzke, N., Mindell, D.P., Reville, E. &  
339 Smith, A.B. (2012) Approaching a state shift in Earth’s biosphere. *Nature*, **486**, 52–8.
- Bestelmeyer, B.T., Ellison, A.M., Fraser, W.R., Gorman, K.B., Holbrook, S.J., Laney, C.M., Ohman,  
M.D., Peters, D.P.C., Pilsbury, F.C., Rassweiler, A., Schmitt, R.J. & Sharma, S. (2011) Detecting  
342 and managing abrupt transitions in ecological systems. *Ecosphere*, **2**, 129.
- Biggs, R., Carpenter, S.R. & Brock, W.A. (2009) Turning back from the brink: detecting an im-  
pending regime shift in time to avert it. *Proceedings of the National Academy of Sciences, USA*,  
345 **106**, 826–831.
- Bittleston, L.S., Pierce, N.E., Ellison, A.M. & Pringle, A. (2016) Convergence in Multispecies  
Interactions. *Trends in Ecology & Evolution*, **31**, 269–280.



- 348 Boynton, P. (2012) Ecological Patterns and Processes in *Sarracenia* Carnivorous Pitcher Plant  
Fungi.
- Bradshaw, W.E. & Creelman, R.A. (1984) Mutualism between the carnivorous purple pitcher  
351 plant *Sarracenia purpurea* and its inhabitants. *American Midland Naturalist*, **112**, 294–304.
- Brook, B.W., Ellis, E.C., Perring, M.P., Mackay, A.W. & Blomqvist, L. (2013) Does the terrestrial  
biosphere have planetary tipping points? *Trends in Ecology & Evolution*, **28**, 396–401.
- 354 Butler, J.L., Atwater, D.Z. & Ellison, A.M. (2005) Red-spotted newts: an unusual nutrient source  
for northern pitcher plants. *Northeastern Naturalist*, **12**, 1–10.
- Butler, J.L. & Ellison, A.M. (2007) Nitrogen cycling dynamics in the carnivorous pitcher plant,  
357 *Sarracenia purpurea*. *Functional Ecology*, **21**, 835–843.
- Butler, J.L., Gotelli, N.J. & Ellison, A.M. (2008) Linking the brown and green: nutrient transfor-  
mation and fate in the *Sarracenia* microecosystem. *Ecology*, **89**, 898–904.
- 360 Carpenter, S.R. (1998) The need for large-scale experiments to assess and predict the response of  
ecosystems to perturbation. M.L. Pace & P.M. Groffman, eds., *Successes, limitations, and frontiers  
in ecosystem science*, 12, pp. 287–312. Springer-Verlag, New York, NY.
- 363 Carpenter, S.R. & Brock, W.A. (2006) Rising variance: a leading indicator of ecological transition.  
*Ecology Letters*, **9**, 311–318.
- Carpenter, S.R., Cole, J.J., Pace, M.L., Batt, R., Brock, W.A., Cline, T., Coloso, J., Hodgson, J.R.,  
366 Kitchell, J.F., Seekell, D.A., Smith, L. & Weidel, B. (2011) Early warnings of regime shifts: a  
whole-ecosystem experiment. *Science*, **332**, 1079–1082.
- Carpenter, S.R., Christensen, D.L., Cole, J.J., Cottingham, K.L., He, X., Hodgson, J.R., Kitchell,  
369 J.F., Knight, S.E., Pace, M.L. & et al., . (1995) Biological Control of Eutrophication in Lakes.  
*Environmental Science & Technology*, **29**, 784–786.

- Chislock, M.F., Doster, E., Zitomer, R.A. & Wilson, A.E. (2013) Eutrophication: Causes, Consequences, and Controls in Aquatic Ecosystems. *Nature Education Knowledge*, **4**, 10.
- Cochran-Stafira, D.L. & von Ende, C.N. (1998) Integrating bacteria into food webs: studies with *Sarracenia purpurea* inquilines. *Ecology*, **79**, 880–898.
- Contamin, R. & Ellison, A.M. (2009) Indicators of regime shifts in ecological systems: what do we need to know and when do we need to know it? *Ecological Applications*, **19**, 799–816.
- Dakos, V., Carpenter, S.R., Brock, W.A., Ellison, A.M., Guttal, V., Ives, A.R., Kéfi, S., Livina, V., Seekell, D.A., van Nes, E.H. & Scheffer, M. (2012) Methods for detecting early warnings of critical transitions in time series illustrated using simulated ecological data. *PloS one*, **7**, e41010.
- Ellison, A.M. (2006) Nutrient limitation and stoichiometry of carnivorous plants. *Plant Biology*, **8**, 740–747.
- Ellison, A.M. & Gotelli, N.J. (2009) Energetics and the evolution of carnivorous plants - Darwin's "most wonderful plants in the world". *Journal of Experimental Botany*, **60**, 19–42.
- Gallie, D.R. & Chang, S.C. (1997) Signal transduction in the carnivorous plant *Sarracenia purpurea* - Regulation of secretory hydrolase expression during development and in response to resources. *Plant Physiology*, **115**, 1461–1471.
- Givnish, T.J., Burkhardt, E.L., Happel, R.E. & Weintraub, J.D. (1984) Carnivory in the bromeliad *Brocchinia reducta*, with a cost/ benefit model for the general restriction of carnivorous plants to sunny, moist nutrient-poor habitats. *American Naturalist*, **124**, 479–497.
- Heard, S.B. (1994) Pitcher plant midges and mosquitoes: a processing chain commensalism. *Ecology*, **75**, 1647–1660.
- Hoekman, D. (2010) Turning up the heat: Temperature influences the relative importance of top-down and bottom-up effects. *Ecology*, **91**, 2819–2825.

Jones, F.M. (1923) The most wonderful plant in the world. *Natural History*, **23**, 589–596.

Kingsolver, J.G. (1979) Thermal and Hydric Aspects of Environmental Heterogeneity in the  
396 Pitcher Plant Mosquito. *Ecological Monographs*, **49**, 357–376.

Kitching, R.L. (2000) *Food webs and container habitats : the natural history and ecology of phytotelmata*.  
Cambridge University Press Cambridge.

399 Lau, M.K., Borrett, S.R., Hines, D.E. & Singh, P. (2016) enaR: Tools for Ecological Network Anal-  
ysis.

Levine, N.M., Zhang, K., Longo, M., Baccini, A., Phillips, O.L., Lewis, S.L., Alvarez-Dávila, E.,  
402 Segalin de Andrade, A.C., Brienen, R.J.W., Erwin, T.L., Feldpausch, T.R., Monteagudo Men-  
doza, A.L., Nuñez Vargas, P., Prieto, A., Silva-Espejo, J.E., Malhi, Y. & Moorcroft, P.R. (2016)  
Ecosystem heterogeneity determines the ecological resilience of the Amazon to climate change.  
405 *Proceedings of the National Academy of Sciences*, **113**, 793–797.

McCann, K.S. (2012) *Food Webs (MPB-50)*. Princeton University Press.

Mittlebach, G.G., Turner, A.M., Hall, D.J., Rettig, J.E. & Osenberg, C.W. (1995) Perturbation and  
408 resilience: a long-term, whole-lake study of predator extinction and reintroduction. *Ecology*,  
**76**, 2347–2360.

Mulder, C. & Hendriks, A.J. (2014) Half-saturation constants in functional responses. *Global*  
411 *Ecology and Conservation*, **2**, 161–169.

Peterson, C.N., Day, S., Wolfe, B.E., Ellison, A.M., Kolter, A.M. & Pringle, A. (2008) A keystone  
predator controls bacterial diversity in the pitcher plant (*Sarracenia purpurea*) microecosystem.  
414 *Environmental Microbiology*, **10**, 2257–2266.

Petraitis, P.S. & Dudgeon, S.R. (2016) Cusps and butterflies: multiple stable states in marine  
systems as catastrophes. *Marine and Freshwater Research*, **67**, 37.

- 417 R Core Team (2016) R: A Language and Environment for Statistical Computing.
- Scheffer, M., Bascompte, J., Brock, W.A., Brovkin, V., Carpenter, S.R., Dakos, V., Held, H., van  
Nes, E.H., Rietkerk, M. & Sugihara, G. (2009) Early-warning signals for critical transitions.  
420 *Nature*, **461**, 53–59.
- Scheffer, M., Carpenter, S., Foley, J.A., Folke, C. & Walker, B. (2001) Catastrophic shifts in ecosys-  
tems. *Nature*, **413**, 591–596.
- 423 Schnell, D.E. (2002) *Carnivorous plants of the United States and Canada*, volume 2. Timber Press,  
Portland, Oregon, USA.
- Sirota, J., Baiser, B., Gotelli, N.J. & Ellison, A.M. (2013) Organic-matter loading determines regime  
426 shifts and alternative states in an aquatic ecosystem. *Proceedings of the National Academy of  
Sciences*, **110**, 7742–7747.
- Sitvarin, M.I., Rypstra, A.L. & Harwood, J.D. (2016) Linking the green and brown worlds through  
429 nonconsumptive predator effects. *Oikos*, **125**, 1057–1068.
- Srivastava, D.S., Kolasa, J., Bengtsson, J., Gonzalez, A., Lawler, S.P., Miller, T.E., Munguia, P.,  
Romanuk, T., Schneider, D.C. & Trzcinski, M.K. (2004) Are natural microcosms useful model  
432 systems for ecology? *Trends EcolEvol*, **19**, 379–384.
- Ulanowicz, R.E. (2012) *Growth and Development: Ecosystems Phenomenology*. Springer Science &  
Business Media.
- 435 Vaquer-Sunyer, R. & Duarte, C.M. (2008) Thresholds of hypoxia for marine biodiversity. *PNAS*,  
**105**, 15452–7.
- Wolkovich, E.M., Allesina, S., Cottingham, K.L., Moore, J.C., Sandin, S.A. & de Mazancourt, C.  
438 (2014) Linking the green and brown worlds: the prevalence and effect of multichannel feeding  
in food webs. *Ecology*, **95**, 3376–3386.

Wood, K.A., O'Hare, M.T., McDonald, C., Searle, K.R., Daunt, F. & Stillman, R.A. (2016) Herbi-  
441 vore regulation of plant abundance in aquatic ecosystems. *Biological Reviews*.

Table 1: Terms, units, and interpretation for the model of oxygen dynamics in pitcher plant fluid.

| Term                  | Units                                                   | Interpretation                                                                                   |
|-----------------------|---------------------------------------------------------|--------------------------------------------------------------------------------------------------|
| $t$                   | minutes                                                 | time (model iteration)                                                                           |
| $f$                   | $1/t$                                                   | Constant adjusting sine wave of diurnal PAR for frequency of measurements                        |
| $x_t$                 | mg/L                                                    | [O <sub>2</sub> ]: concentration of oxygen in the pitcher fluid                                  |
| <b>Photosynthesis</b> |                                                         |                                                                                                  |
| $A_t$                 | mg/L                                                    | Production of oxygen by photosynthesis, and infused from the plant into the fluid during the day |
| $a_t$                 | mg/L                                                    | Photosynthetic rate augmentation by microbial nutrient mineralization                            |
| $a_{min}, a_{max}$    | mg/L                                                    | Min or max possible photosynthetic augmentation                                                  |
| PAR                   | $\mu\text{mol} \cdot \text{m}^{-2} \cdot \text{s}^{-1}$ | Photosynthetically active radiation                                                              |
| <b>Respiration</b>    |                                                         |                                                                                                  |
| $w_t$                 | mg                                                      | Mass of prey remaining at time $t$                                                               |
| $W$                   | mg                                                      | Maximum mass of decomposable prey (set at $75\mu$ g)                                             |
| $K_w$                 | mg/min                                                  | Half-saturation constant for bacterial carrying capacity                                         |
| $m$                   | mg/L                                                    | Basal metabolic oxygen used by bacteria (respiration)                                            |
| <b>Nutrients</b>      |                                                         |                                                                                                  |
| $n_t$                 | mg/L                                                    | Quantity of nutrients mineralized by decomposition; a function of $w_t$ , and $x_t$              |
| $s$                   | dimensionless                                           | Sigmoidal curve steepness relating nutrient mineralization to augmentation                       |
| $d$                   | mg                                                      | Inflection point of sigmoidal curve relating mineralization to augmentation                      |
| $\beta$               | dimensionless                                           | The rate of prey decomposition                                                                   |

## Figure legends

Figure 1: The threshold dynamics of the Hill function are determined in part by the inflection parameter  $h$ . A) Plotted output of the Hill function for different values of  $h$  (different lines shaded darker for lower values), ranging from 0.1 to 150 with  $p = 10$ . B) Lagged ( $k = 1$  lag term) phase plot of the Hill function with  $h = 71.11$ , showing the state transition (lower-left to upper-right). A small amount of random variation was introduced to the series to reveal overlapping points within the two states.

Figure 2: A) The pitcher plant model shown as a network diagram. The nodes in the graph, and their corresponding variables in the model are Prey ( $w$ ), the microbially-dominated Food Web (controlled by  $K_w$ ), Nitrogen ( $n$ ), Oxygen ( $x$ ), and the Pitcher Plant itself, which is included to show the fluxes of nitrogen, and oxygen as they relate to the plant. B) Photosynthetically Active Radiation (PAR) from the sun or other light source modeled as a sine wave. Although negative values of PAR are set equal to zero in our model's photosynthesis function, we show here the full sine-wave to illustrate the mathematical function from which PAR is derived. C) The relationship between PAR, and photosynthesis in the pitcher plant. D) The output of dissolved oxygen in the pitcher fluid as a function of pitcher-plant photosynthesis. E) The decomposition of prey over time as affected by the bacteria within the food web. F) The impact of prey addition ( $t = 2160$ ) on pitcher plant dissolved oxygen.

Figure 3: The addition of prey impacts both photosynthetic oxygen production via augmentation from nutrients mineralized from prey, and oxygen depletion through the biological oxygen demand (BOD) of microbial metabolism. (A) shows how photosynthesis increases when prey is added (grey) on days 4-6 ( $t = 5040$  to  $t = 7920$  minutes; indicated by open circles), relative to when no prey was added (black). (B) Shows the quantity of oxygen used via the BOD of microbial decomposition. The net impact in this parameterization was a decrease in dissolved oxygen when prey was added to the system; (C) shows oxygen present in the pitcher at mid-day. (D) A time-lagged phase plot ( $t_0 = 720$ , lag = 1440 min) showing the change in oxygen production during the prey addition simulation. Beginning, and end points of the simulation are indicated by closed circles. When prey was added at  $t = 5040$ ,  $t = 6480$ , and  $t = 7920$  (open circles), it was decomposed rapidly by the microbially-dominated food web, resulting in oxygen depletion. The altered return trajectory (i.e., hysteresis) resulting from the biological oxygen demand in the system is shown by the arrows indicating the direction of the change in oxygen through time.

Figure 4: Sensitivity analysis of the pitcher-plant model revealed non-linear effects of varying the parameters  $\beta$ , and  $K_w$  ( $n = 15000$  simulations). Contour plots show the percent time the system spent in an hypoxic state (top row), and the Pearson correlation coefficient for the decycled trend (bottom row). The sensitivity simulations were repeated for additions of prey corresponding to  $1 \text{ mgmL}^{-1}$  (left column), and  $100 \text{ mgmL}^{-1}$  (right column) of prey added to the microecosystem. The LSE estimate for  $\beta$  ( $\pm 1 \text{ sE}$ ) is plotted in each contour plot as vertical solid, and dashed lines, respectively.



Figure 5: Oxygen dynamics in three simulations using different levels of  $K_w$  (light-grey = 0.1, dark-grey = 0.5, and black = 1) with the same rate of decomposition ( $\beta = 2.0E-6$ ) illustrating hysteresis (i.e., altered return trajectory) of the system. (A) Lower levels of  $K_w$  produce slower return rates over the course of the simulation. Prey addition (open circles) depressed mid-day oxygen curves at lower values of  $K_w$ . Closed circles indicate the first, and last mid-day prey addition points. (B) A time-lagged ( $t = 1440$ ) phase plot for the same simulations showing that lower values of  $K_w$  led to the oxygen being at lower levels for more time following prey addition (open circles), but followed a similar return trajectory as prey was decomposed by the food web (closed circles also indicate the beginning, and end of each series). Although all three series ran for the same amount of time, the lengths of the trajectories are different in phase space because lower values of  $K_w$  resulted in the system spending more time with the same amount of oxygen (i.e.,  $x_t = x_{t+1440}$ ).

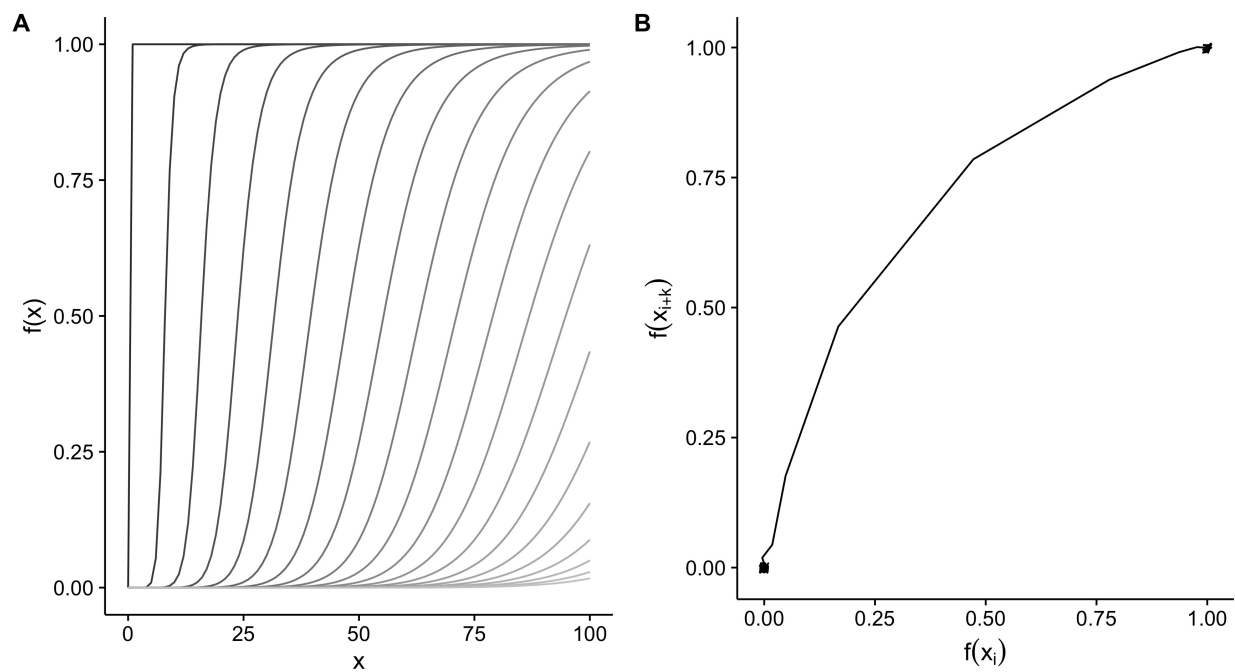

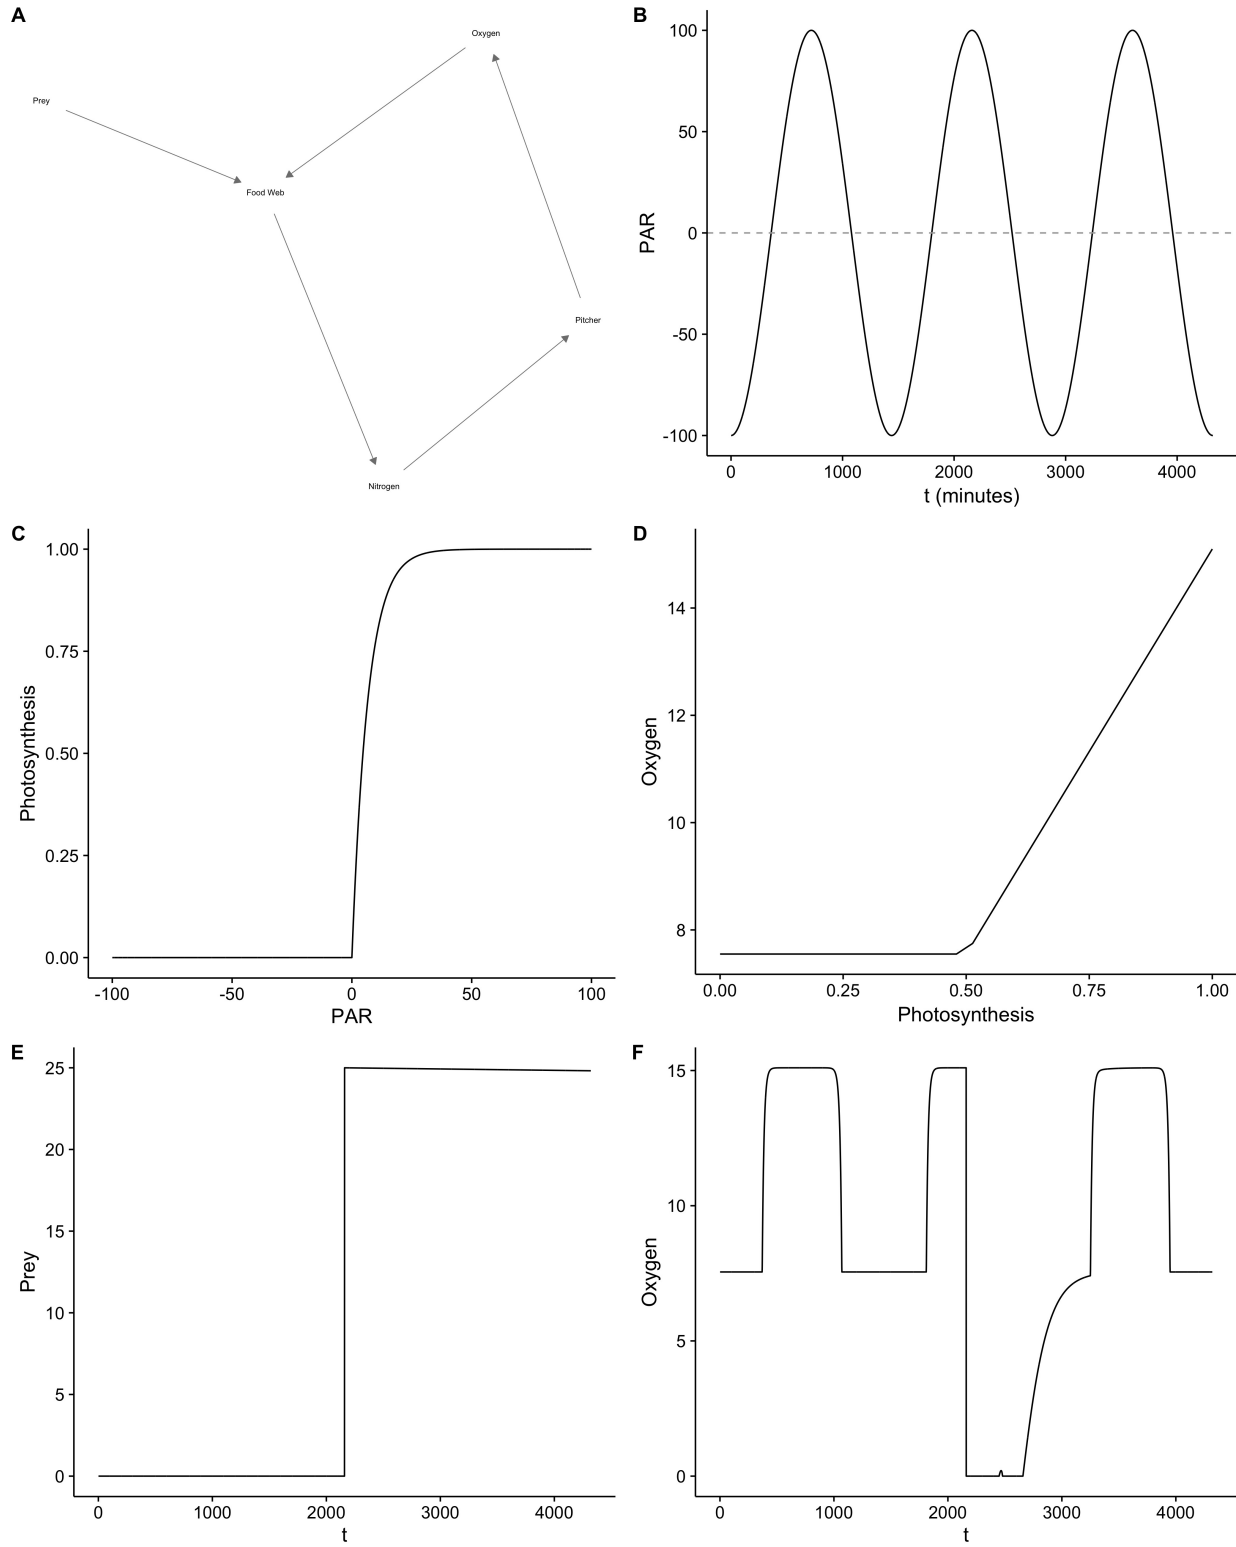

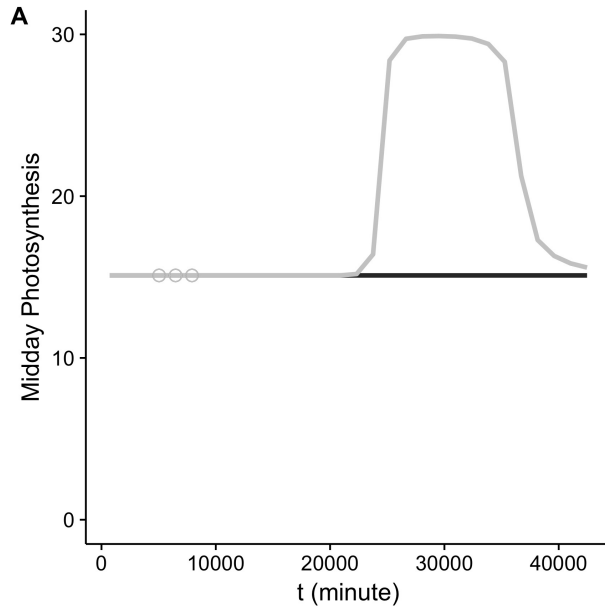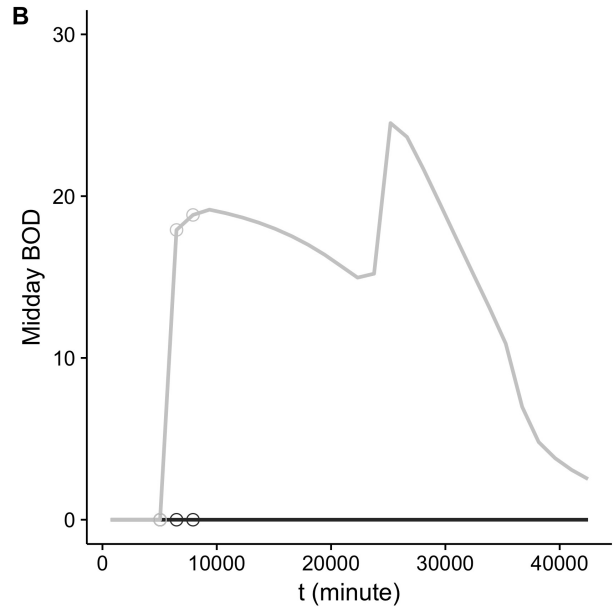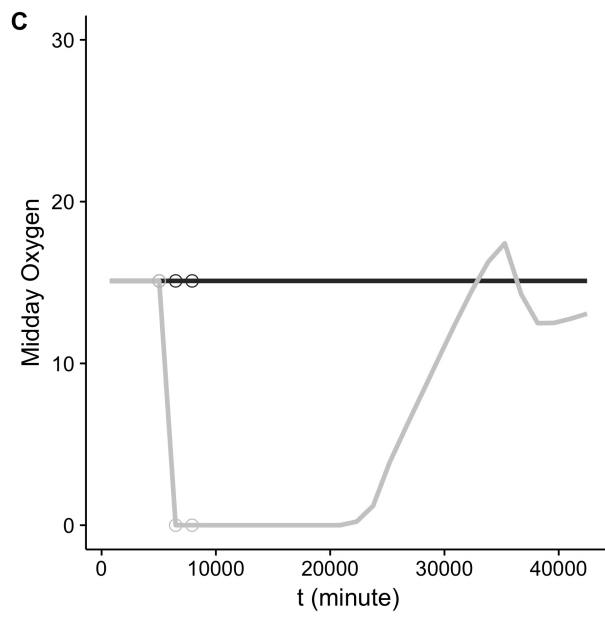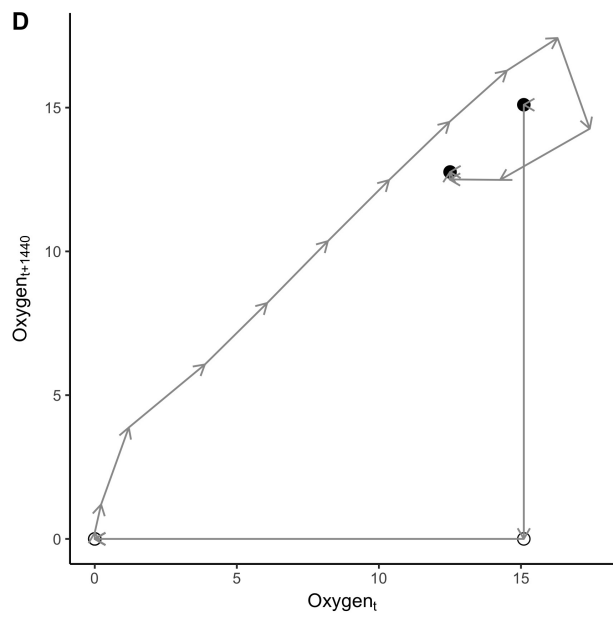

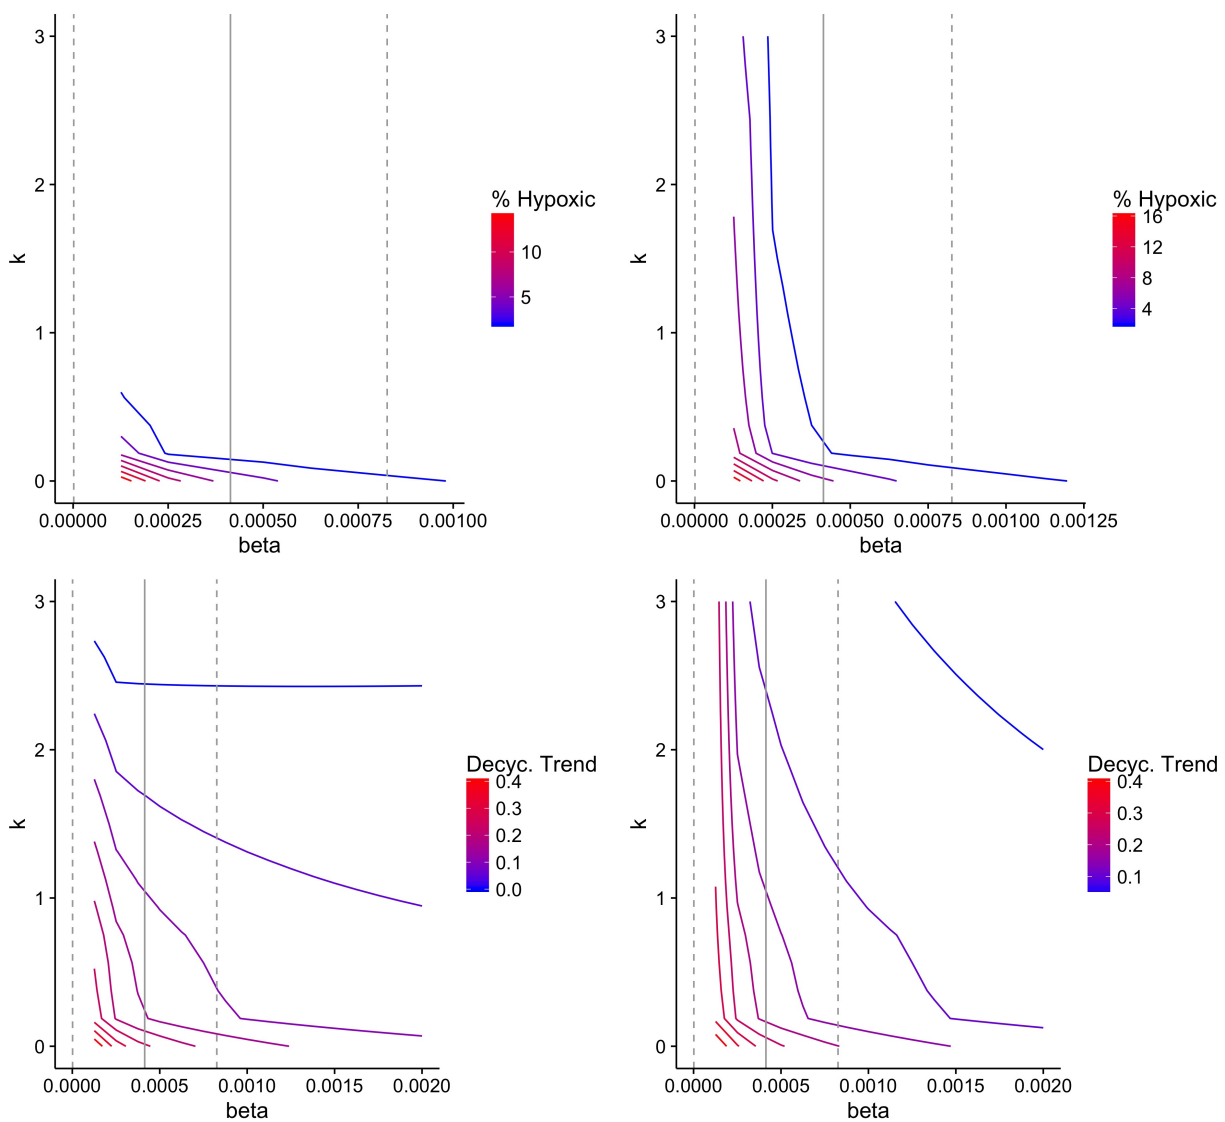

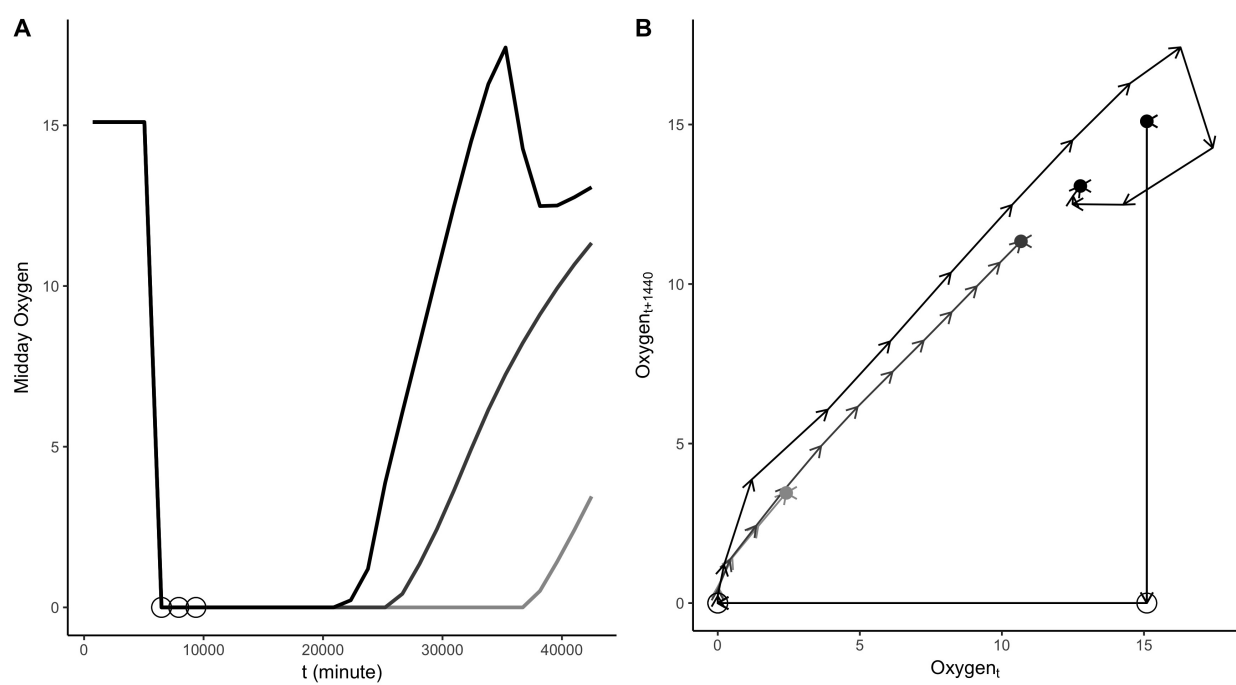

Source: https://www.biorxiv.org/content/10.1101/087296v2.full.pdf
